# Supplementary material for: A new bifunctional fluorescent sensor based on naphthalimide-functionalized silica nanoparticles for detection and adsorption of Cu2+ in aqueous solution
Source: Royal Society of Chemistry journal article supplement (doi:10.1039/c5ay01481f), 2015-01-01

## Supporting Information

### **A new bifunctional fluorescent sensor based on naphthalimide-functionalized silica nanoparticles for detection and adsorption of Cu<sup>2+</sup> in aqueous solution**

Xiangyang Zhang\*, Youming Shen\*, Hui Zhang, Junling Jin, Shibiao Zhou

College of Chemistry and Chemical Engineering, Hunan University of Arts and Science, Changde 415000, PR China

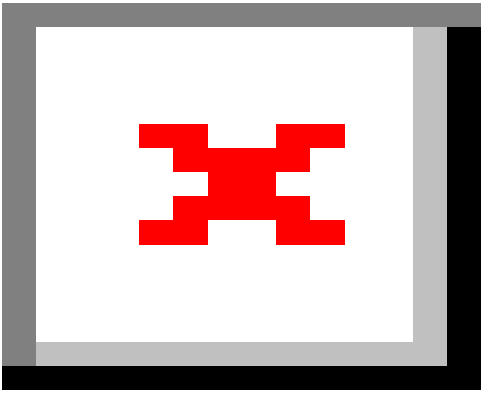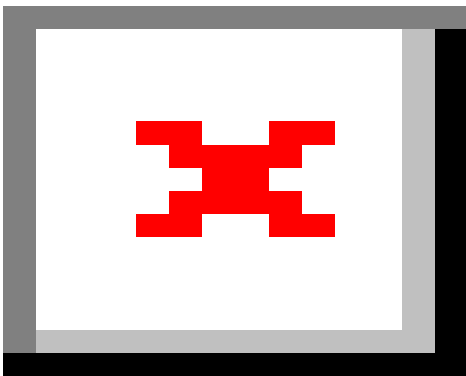

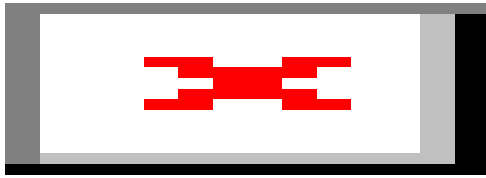

Supplement: c5ay01481f1.pdf [file c5ay01481f1.pdf]
